# Supplementary material for: Architecture of the human mTORC2 core complex
Source: eLife journal article supplement (doi:10.7554/elife.33101), 2018-02-09
Supplement: supp [file elife-33101-supp-v1.zip]

Archive with 7 entries (7 files):
- elife_poa_e33101_Figure_1_figure_supplement_2.pdf
- elife_poa_e33101_Figure_2_figure_supplement_1.pdf
- elife_poa_e33101_Transparent_Reporting_File.pdf
- elife_poa_e33101_Figure_1_figure_supplement_1.pdf
- elife_poa_e33101_Figure_1_figure_supplement_5.pdf
- elife_poa_e33101_Figure_1_figure_supplement_4.pdf
- elife_poa_e33101_Figure_1_figure_supplement_3.pdf
