# Supplementary material for: Architecture of the human mTORC2 core complex
Source: eLife journal article supplement (doi:10.7554/elife.33101), 2018-02-09

**A** Representative micrograph

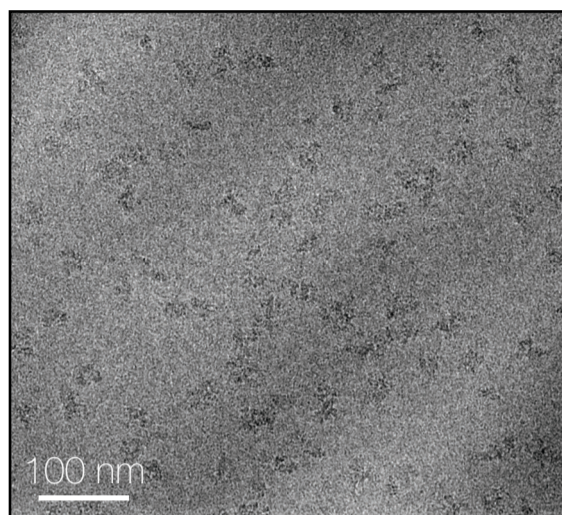

Fourier transform (CTFFIND4)

**B**

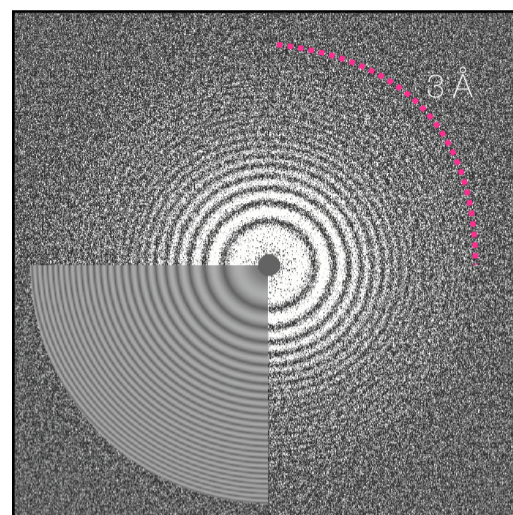

**C**

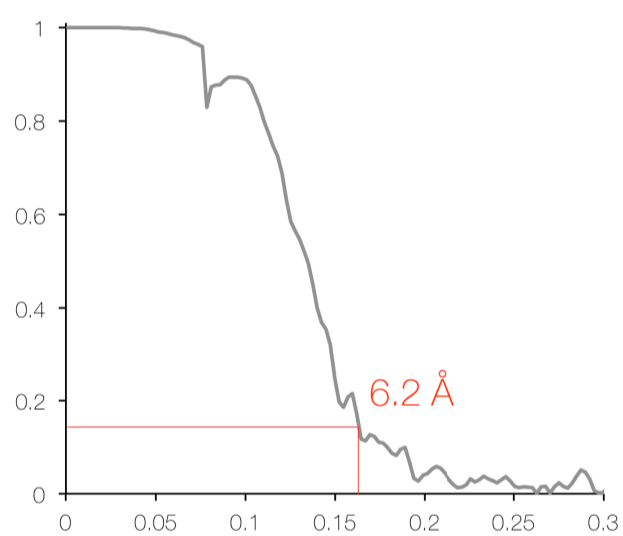

FSC curve - accessory factors

**D**

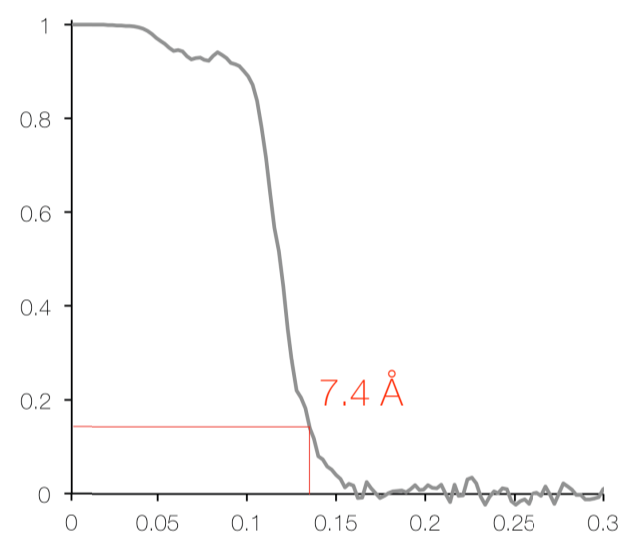

FSC curve - complete C2 mTORC2

**E**

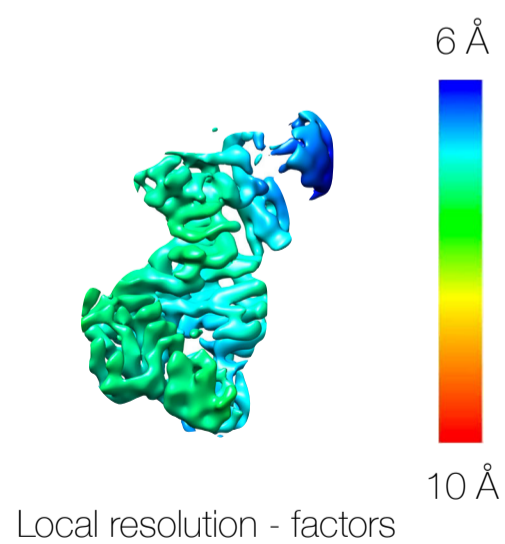

**F**

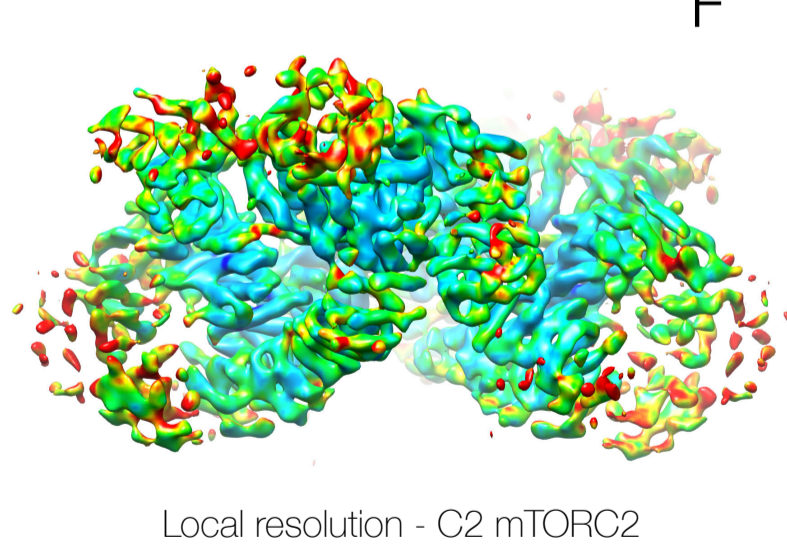

Supplement: supp [file elife-33101-supp-v1.zip › elife_poa_e33101_Figure_1_figure_supplement_3.pdf]
