# Supplementary material for: Architecture of the human mTORC2 core complex
Source: eLife journal article supplement (doi:10.7554/elife.33101), 2018-02-09
Supplement: supp [file elife-33101-supp-v1.zip › elife_poa_e33101_Figure_1_figure_supplement_4.pdf]

2D classification 1 - (207 920)

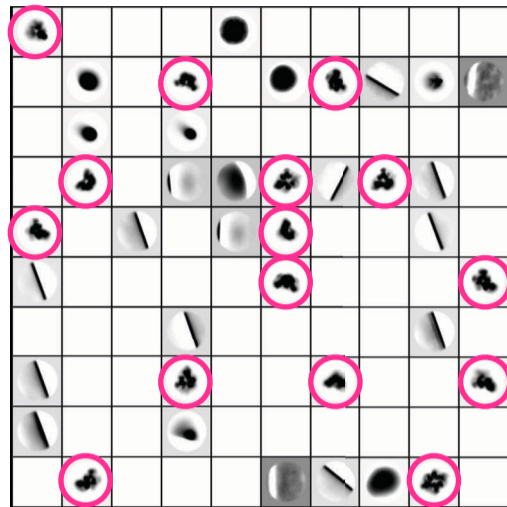

2D classification 2 - (100 816)

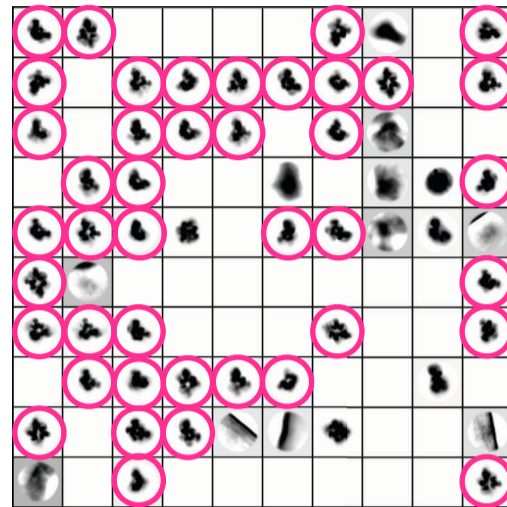

3D classification - (94 953)

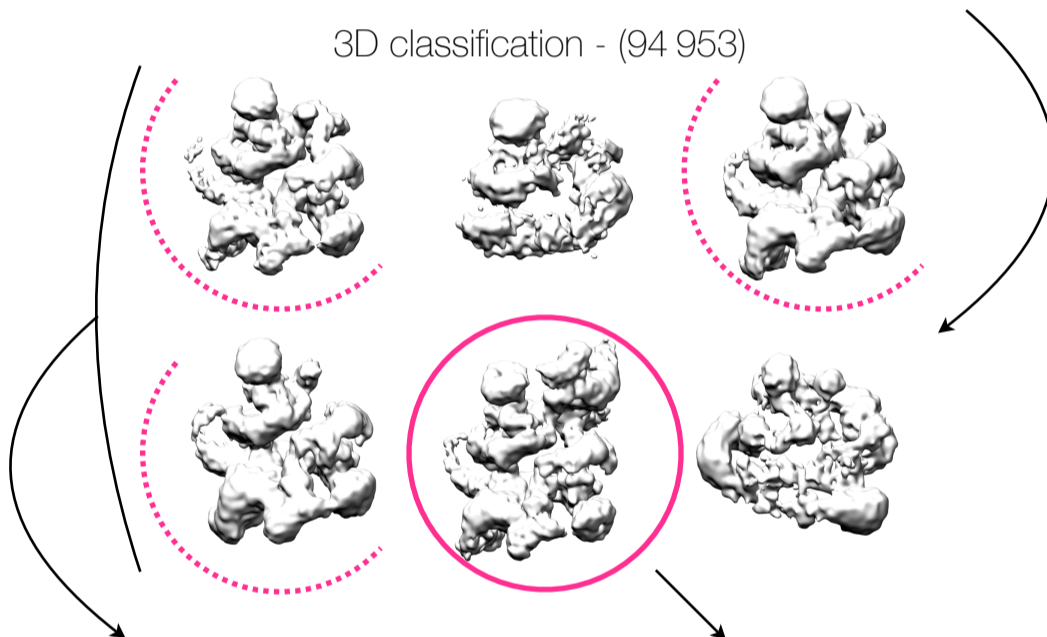

All accessory factors - (83 362)  
mTOR-mLST8 subtracted

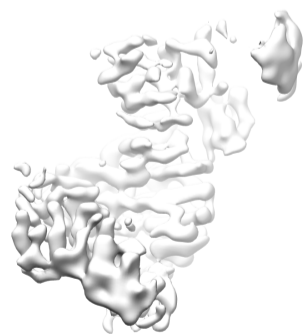

Focused refinement - 6.2 Å

Complete mTORC2 - (17 183)  
refined with C2 symmetry

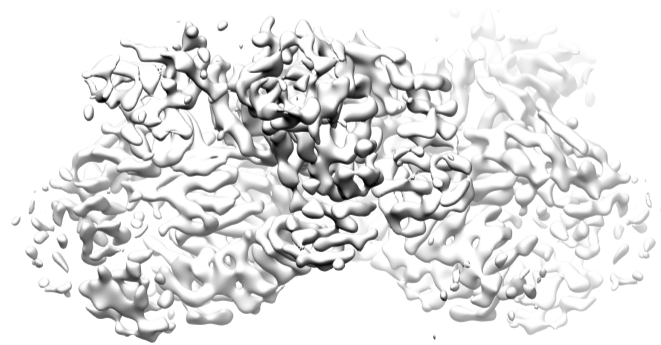

Full refinement C2 - 7.4 Å
