# Supplementary figures and images for: Architecture of the human mTORC2 core complex
Source: eLife journal article supplement (doi:10.7554/elife.33101), 2018-02-09

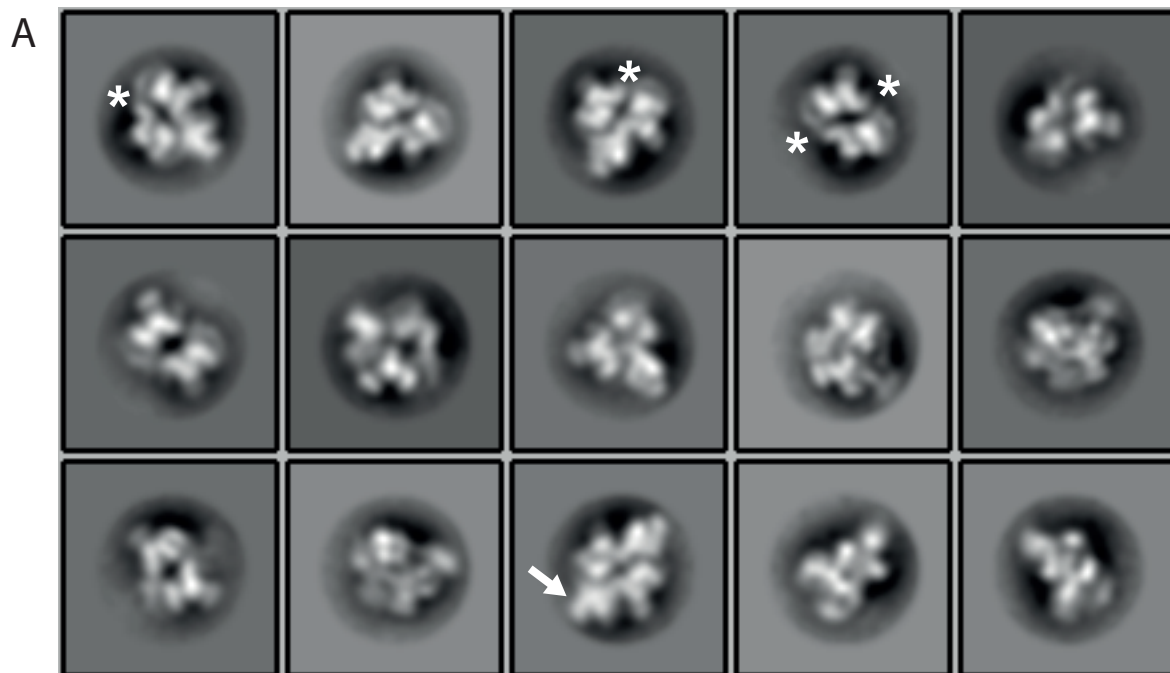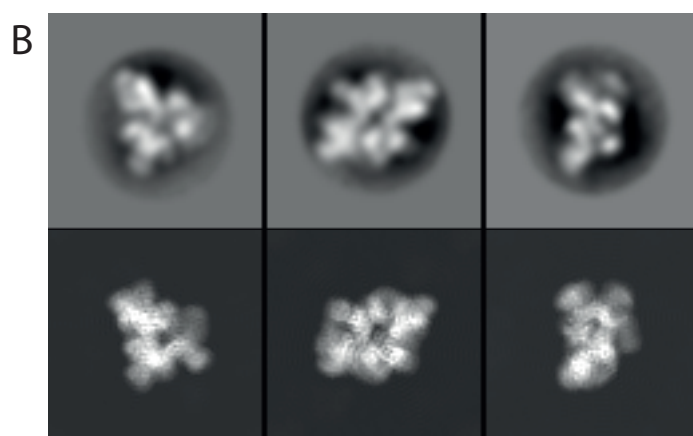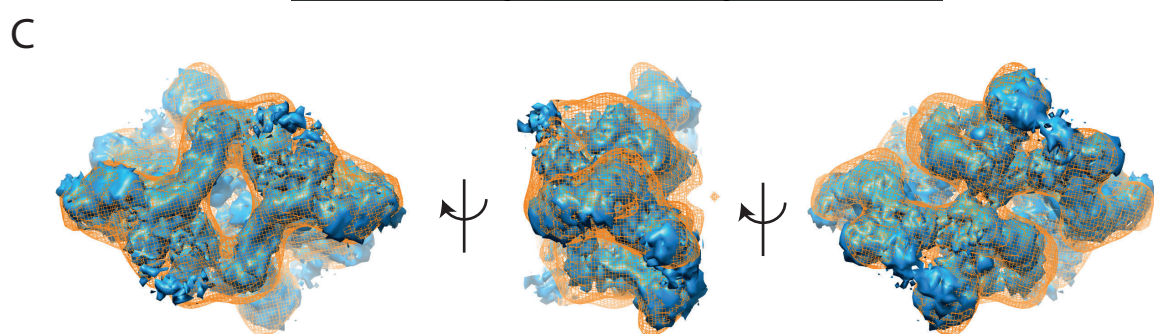

Supplement: supp [file elife-33101-supp-v1.zip › elife_poa_e33101_Figure_1_figure_supplement_2.pdf]

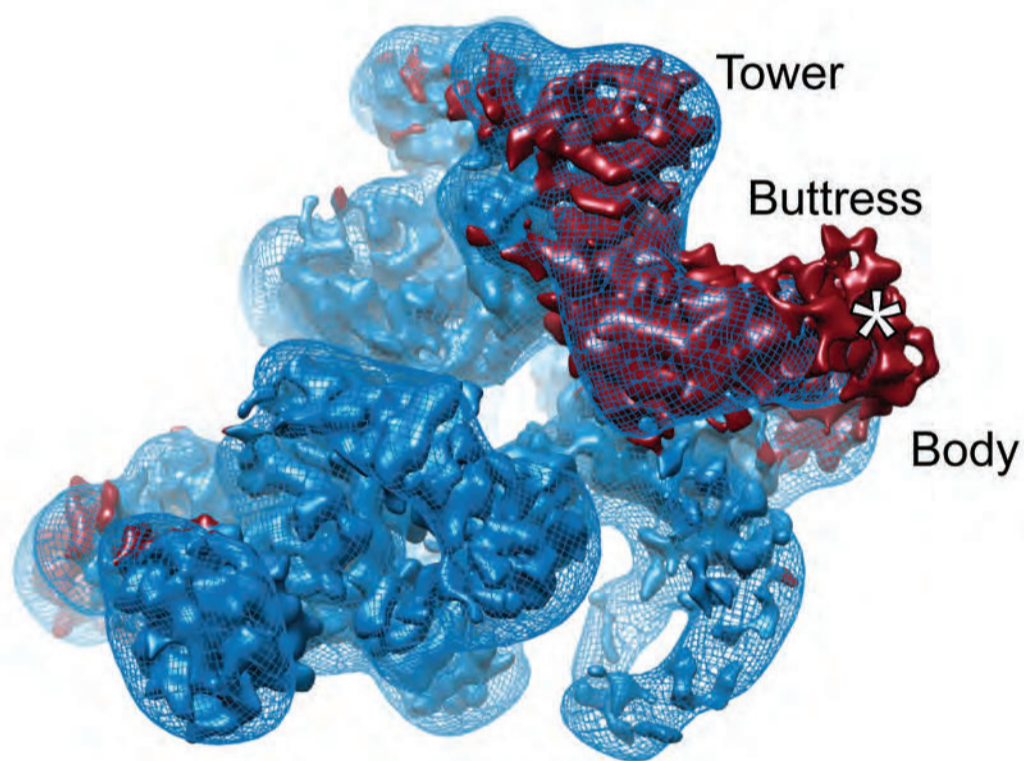

Supplement: supp [file elife-33101-supp-v1.zip › elife_poa_e33101_Figure_2_figure_supplement_1.pdf]

a

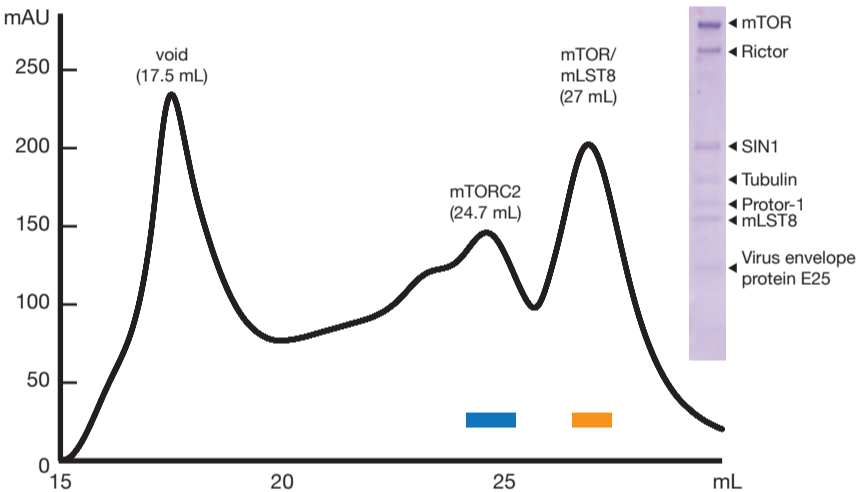

b

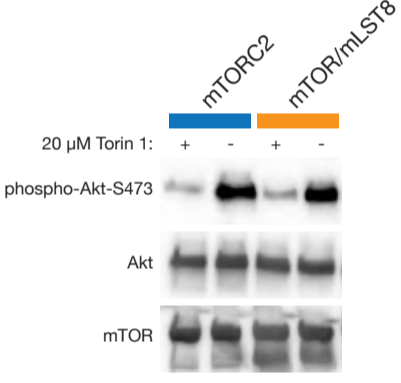

Supplement: supp [file elife-33101-supp-v1.zip › elife_poa_e33101_Figure_1_figure_supplement_1.pdf]

A

*Hs* mTORC2

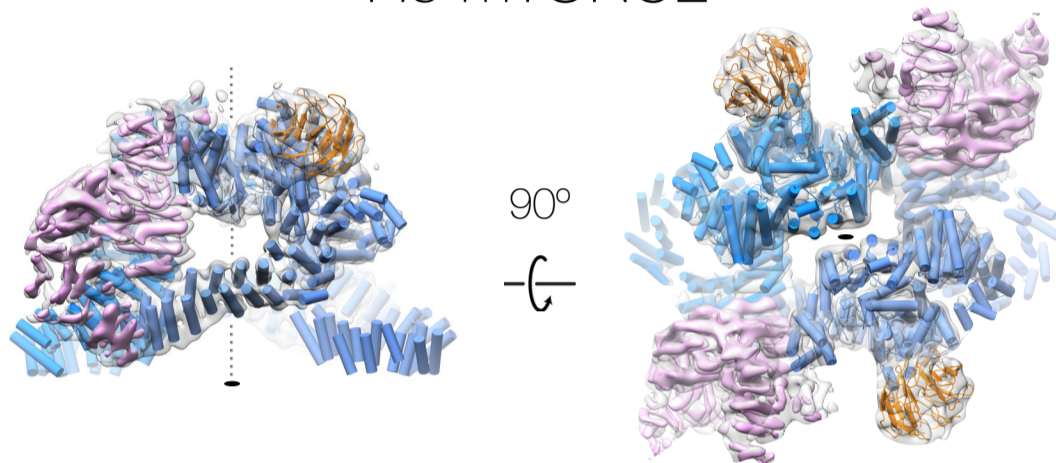

B

*Km* TORLst8

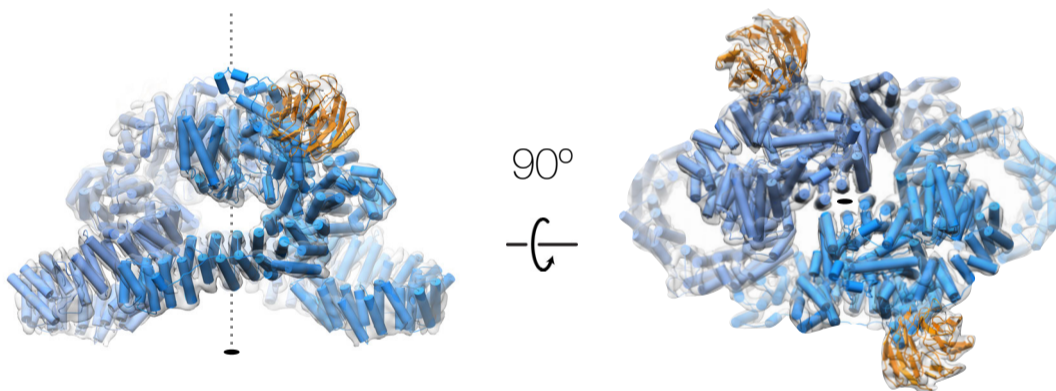

C

*Sc* TORC2

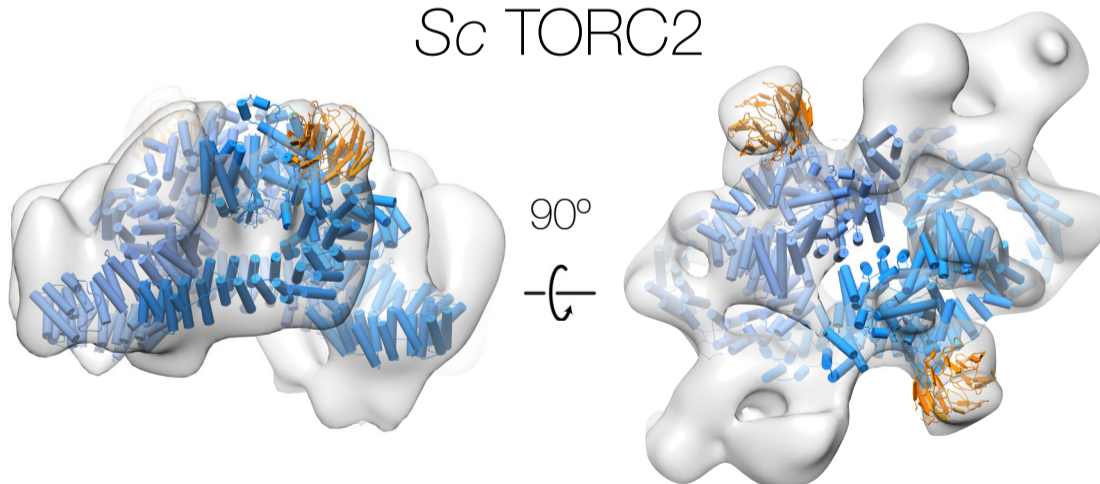

Supplement: supp [file elife-33101-supp-v1.zip › elife_poa_e33101_Figure_1_figure_supplement_5.pdf]
